# Supplementary material for: Polymorphism of the antiviral agent clevudine
Source: Royal Society of Chemistry journal article supplement (doi:10.1039/c6ce01975g), 2016-01-01
Supplement: c6ce01975g1.pdf [file c6ce01975g1.pdf]

## ESI material for the manuscript:

### Polymorphism of the antiviral agent clevudine

T. J. Noonan, B. Mzondo, S. A. Bourne and M. R. Caira

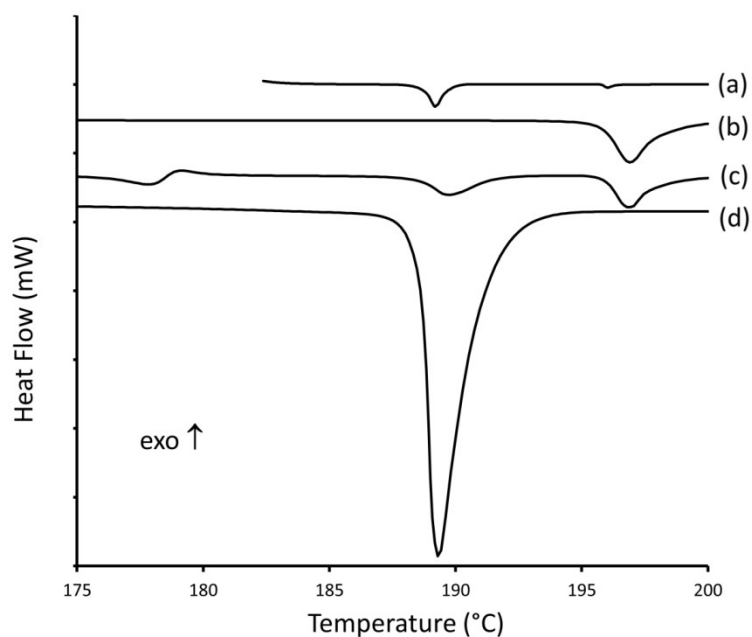

**Fig S1.** DSC traces for clevudine (a) Form 1 at 2 K min<sup>-1</sup> (b) Form 3 at 10 K min<sup>-1</sup> (c) Form 2 at 10 K min<sup>-1</sup> (d) Form 1 at 10 K min<sup>-1</sup>.

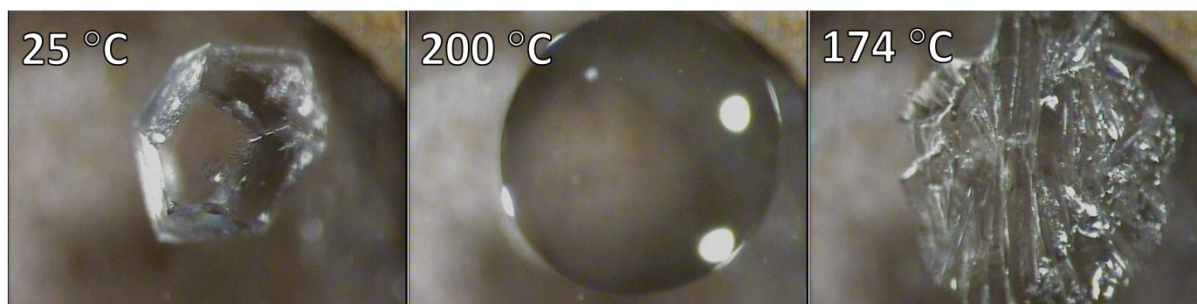

**Fig. S2.** HSM photographs of clevudine Form 1 at ambient temperature, after melting and finally after recrystallization during cooling.

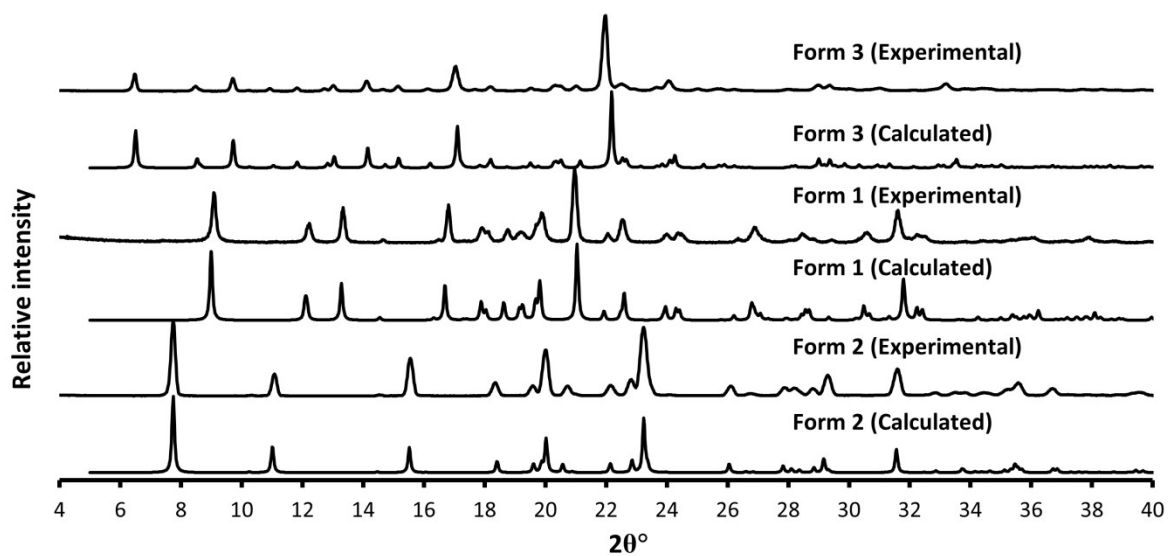

**Fig. S3.** Experimental and calculated PXRD patterns for the three clevidine forms.

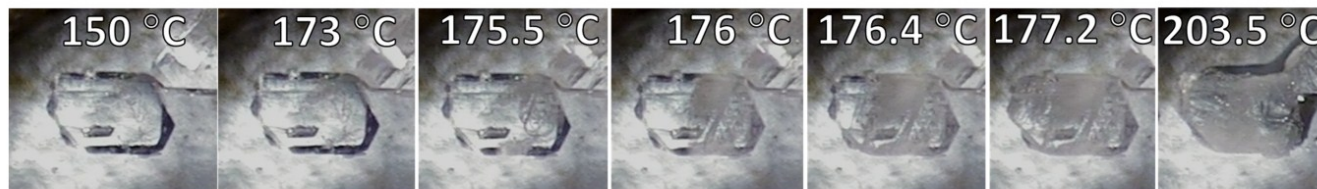

**Fig. S4.** HSM micrographs of clevidine Form 2 recorded during heating at 2 K min<sup>-1</sup>.

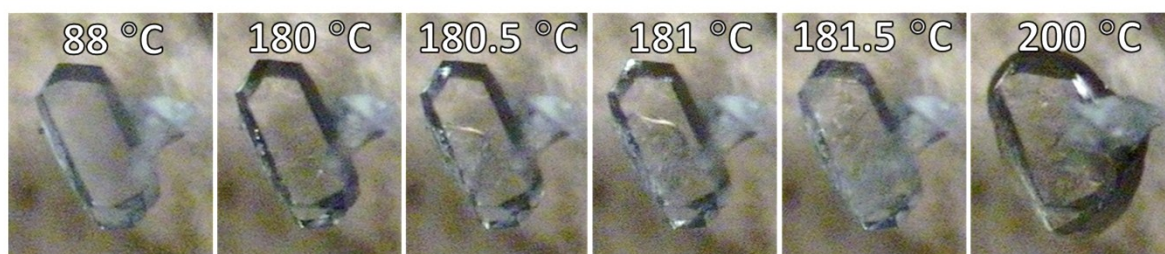

**Fig. S5.** HSM micrographs of clevidine Form 2 recorded during heating at 5 K min<sup>-1</sup>.
